# Supplementary material for: Proteus-species-associated periprosthetic hip and knee joint infections – a 15-year cohort analysis
Source: Copernicus journal article supplement (doi:10.5194/jbji-10-265-2025), 2025-08-11
Supplement: Supplementary file [file jbji-10-265-2025-supplement.pdf]

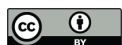

*Supplement of*

## ***Proteus*-species-associated periprosthetic hip and knee joint infections – a 15-year cohort analysis**

**Veronika Achatz et al.**

*Correspondence to:* Jochen G. Hofstaetter (researchlab@oss.at)

The copyright of individual parts of the supplement might differ from the article licence.

| Pat. | Joint | Surgical procedure | Microorganisms                                                                        | Prior infections                              | Initial antibiotic therapy    | Targeted antibiotic therapy                       | Targeted therapy initiation (PoD) | Mixed infection – targeted AB ****                                                                                                                            | Duration (weeks) | Tier class. | success /failure |
|------|-------|--------------------|---------------------------------------------------------------------------------------|-----------------------------------------------|-------------------------------|---------------------------------------------------|-----------------------------------|---------------------------------------------------------------------------------------------------------------------------------------------------------------|------------------|-------------|------------------|
| 2    | rTHA  | Two-stage          | <i>P. mirabilis</i> + <i>S. epidermidis</i>                                           | <i>P. mirabilis</i>                           | Teicoplanin***+Moxifloxacin** | <b>Ceftriaxone+Ciprofloxacin</b>                  | 4                                 | <b>TRS+Ciprofloxacin</b>                                                                                                                                      | 7                | 4A          | failure          |
| 3    | rTHA  | One-stage          | <i>P. mirabilis</i> + <i>P. aeruginosa</i>                                            | <i>Culture negative</i>                       | Cefuroxime*                   | <b>Meropenem</b>                                  | 4                                 | <b>Meropenem<br/>Ciprofloxacin</b>                                                                                                                            | 8                | 1           | success          |
| 5    | rTHA  | DAIR               | <i>P. mirabilis</i> +<br><i>S. lugdunensis</i> + <i>S. epidermidis</i>                | -                                             | Teicoplanin**                 | <b>Rifampicin</b><br>Doxycycline<br>Ciprofloxacin | 3<br>3<br>7                       | <b>Rifampicin</b><br>Doxycycline<br><b>Ciprofloxacin</b><br><b>Fusidic acid+Ciprofloxacin</b>                                                                 | 9                | 3B          | failure          |
| 6    | rTHA  | Two-stage          | <i>P. mirabilis</i> + <i>P. aeruginosa</i>                                            | <i>S. aureus</i>                              | Teicoplanin***+Meropenem***   | <b>Meropenem</b>                                  | 0                                 | <b>Meropenem<br/>Ciprofloxacin</b>                                                                                                                            | 6                | 1           | success          |
| 7    | rTHA  | DAIR               | <i>P. mirabilis</i> + <i>S. lugdunensis</i>                                           | -                                             | Doxycycline*+Moxifloxacin***  | <b>Rifampicin</b><br>Clindamycin<br>TRS           | 1<br>1<br>8                       | Rifampicin<br>Clindamycin<br><b>TRS</b>                                                                                                                       | 6                | 1           | success          |
| 9    | rTHA  | Two-stage          | <i>P. mirabilis</i> +<br><i>S. epidermidis</i> + <i>C. avidum</i>                     | -                                             | Cefuroxime***+Doxycycline*    | <b>Aztreonam</b><br>Daptomycin                    | 5<br>5                            | <b>Aztreonam</b><br>Daptomycin<br><b>Moxifloxacin</b>                                                                                                         | 8                | 3D          | failure          |
| 16   | rTHA  | Two stage          | <i>P. mirabilis</i> + <i>E. faecalis</i>                                              | <i>unknown</i>                                | Cefuroxime***+Moxifloxacin*** | <b>Moxifloxacin+</b><br>Rifampicin                | 0<br>3                            | <b>Moxifloxacin</b><br>Rifampicin<br><b>AMC</b>                                                                                                               | 12               | 3F          | failure          |
| 17   | rTHA  | DAIR               | <i>P. mirabilis</i> + <i>S. aureus</i>                                                | -                                             | Clindamycin***                | <b>Meropenem</b>                                  | 6                                 | <b>Meropene+Moxifloxacin<br/>Ciprofloxacin+Clindamycin</b>                                                                                                    | 12               | 3D          | failure          |
| 18   | rTKA  | One-stage          | <i>P. mirabilis</i> + <i>S. epidermidis</i>                                           | -                                             | Cefuroxime**+Doxycycline*     | <b>Cefalexin</b>                                  | 11                                | <b>Cefalexin</b><br><b>TRS+ Rifampicin</b><br><b>TRS+ Fusidic acid</b>                                                                                        | 12               | 4A          | failure          |
| 19   | rTHA  | One-stage          | <i>P. mirabilis</i> + <i>E. faecalis</i> +<br><i>E. coli</i>                          | -                                             | Cefazolin***                  | <b>Cefotaxime+</b><br>Daptomycin                  | 7<br>9                            | <b>Cefotaxime</b><br><b>Aztreonam</b> +Daptomycin<br><b>Meropenem</b><br><b>Ceftazidime/Avibactam+Fosfomycin</b><br><b>Ceftazidime/Avibactam+Levofloxacin</b> | 30               | 3D          | failure          |
| 20   | rTHA  | Two stage          | <i>P. mirabilis</i> + <i>E. faecalis</i>                                              | -                                             | PIT***                        | <b>Meropenem</b>                                  | unknown                           | <b>Meropenem</b><br><b>Ciprofloxacin</b><br>Dalbavancin                                                                                                       | 24               | 1           | success          |
| 22   | rTHA  | DAIR               | <i>P. vulgaris</i> + <i>E. faecalis</i>                                               | <i>Culture negative</i>                       | Cefazolin**                   | <b>PIT</b>                                        | 7                                 | <b>PIT, Moxifloxacin, AMC, TRS,<br/>Levofloxacin, Teicoplanin</b>                                                                                             | 17               | 4A          | failure          |
| 23   | rTHA  | Two-stage          | <i>P. mirabilis</i> + <i>E. coli</i>                                                  | <i>S. epidermidis</i>                         | Doxycycline**+Teicoplanin**   | <b>Trimethoprim</b>                               | 4                                 | <b>Trimethoprim</b><br><b>Meropenem</b>                                                                                                                       | 12               | 4A          | failure          |
| 25   | rTKA  | Two-stage          | <i>P. mirabilis</i> + <i>E. faecalis</i> ,<br><i>K. pneumoniae</i> , <i>C. koseri</i> | <i>unknown</i>                                | PIT***+Cefazolin*             | <b>PIT+</b><br>Teicoplanin                        | 0<br>4                            | <b>PIT</b><br><b>Aztreonam</b><br><b>Ceftazidime</b><br><b>Ciprofloxacin</b><br>Dalbavancin                                                                   | 12               | 3D          | failure          |
| 26   | rTKA  | DAIR               | <i>P. mirabilis</i> + <i>P. aeruginosa</i> ,<br><i>C. koseri</i> , <i>E. coli</i>     | <i>C. glabrata</i> +<br><i>S. epidermidis</i> | Cefuroxime*                   | <b>Meropenem</b>                                  | 0                                 | <b>Meropenem</b>                                                                                                                                              | 8                | 3E          |                  |

**Table S1:** Detailed microbial profiles, surgical details, antibiotic therapy, and success/failure rate as per the Tier classification in patients with mixed infections. Antibiotics targeted for *Proteus* spp. are indicated in bold, while those targeting co-pathogens are written in regular fonts. Every line represents one patient. Patients 23 and 24 refer to the same patient but are mentioned separately because they underwent different surgeries and treatments. Antibiotic agents targeting co-pathogens are not mentioned in this table. Please see the supplementary material for additional details on antibiotic therapies in polymicrobial infections.

\*Antibiotic therapy was given as perioperative prophylaxis; \*\*antibiotic therapy was started before surgery and continued during surgery; \*\*\*Empirical antibiotic therapy, which was started during surgery and changed accordingly to antibiogram; \*\*\*\*AB changes classified as continued, switched, de-/escalated, or salvage therapy. Pat., patient number; PoD postoperative day; rTHA, revision total hip arthroplasty; rTKA, revision total knee arthroplasty; DAIR, debridement antibiotic and implant retention; UPIC Unexpected, positive intraoperative culture; PIT Piperacillin-tazobactam, TRS trimethoprim-sulfametrol, AMC amoxicillin/clavulanic acid; Tier classification: 1 successful without suppressive antibiotic therapy, 3B septic revision > 1year after PJI diagnosis; 3D septic revision ≤ 1 year after PJI treatment; 3E amputation, resection, arthroplasty, arthrodesis; 3F retained spacer; 4A death within 1 year of PJI treatment.
